# Supplementary material
Source: PubMed Central journal article supplement (PMC5776466)
Supplement: ismej2017186x8.pdf [file ismej2017186x8.pdf]

*N. maritimus* MITMAQMPALIPKEVEIQRLKKIWLIVIAMGSTAASVEVDNFVDGSLHQTSIRDSAFTPA  
*N. brevis* ---MAQMPALLPKEVEIQRLKKIWLVIAMGSTAASVEVDNFVDGSLHQTSIRDSAFTPA  
*N. viennensis* ---MAQMPALIPKEVEIQRLKKIYIMVIMLGSIAASVEVDNFVDGSLHQTAIRDSAFTPA

*N. maritimus* HWWLYSHFVALPLGWGSAAIYDRKVPVLRGPNNSMNTGLKMTILGYLATMFTIGVNEEMWH  
*N. brevis* HWWLYSHFVALPLGWGFAAIYDRKVPVLRGPNNSMNTGLKMTILGYLATMFTIGVNEEMWH  
*N. viennensis* HWWLYSHFVALPVGWGMVAIYDRRVPILRGPGNSMNTGLKLLTIIGYLATMFTIGVNEEMWH

*N. maritimus* FWFVEEIFAVPNHWMFNMGVVVAFMGALAYVVRVYARLVELGAETPGENPYVAEMYKMAL  
*N. brevis* FWFVEEIFAVPNHWMFNMGVVVAFMGALAYVVRVYARLVELGAETPGENPYVAEMYKMAL  
*N. viennensis* FWFVEEIFSVPNHWMFNMGVVVAFMGALAYVVRVYARLVELGAETPAKNPYVAELYLAL

*N. maritimus* EGKLYSRSIP  
*N. brevis* EGKLYSRSIP  
*N. viennensis* EGKLYSRSIP
