# Supplementary material
Source: PubMed Central journal article supplement (PMC5776466)

**A**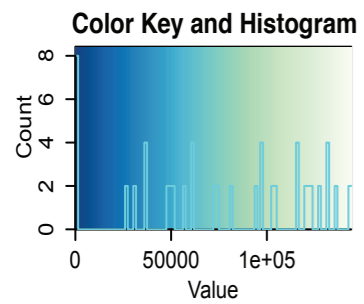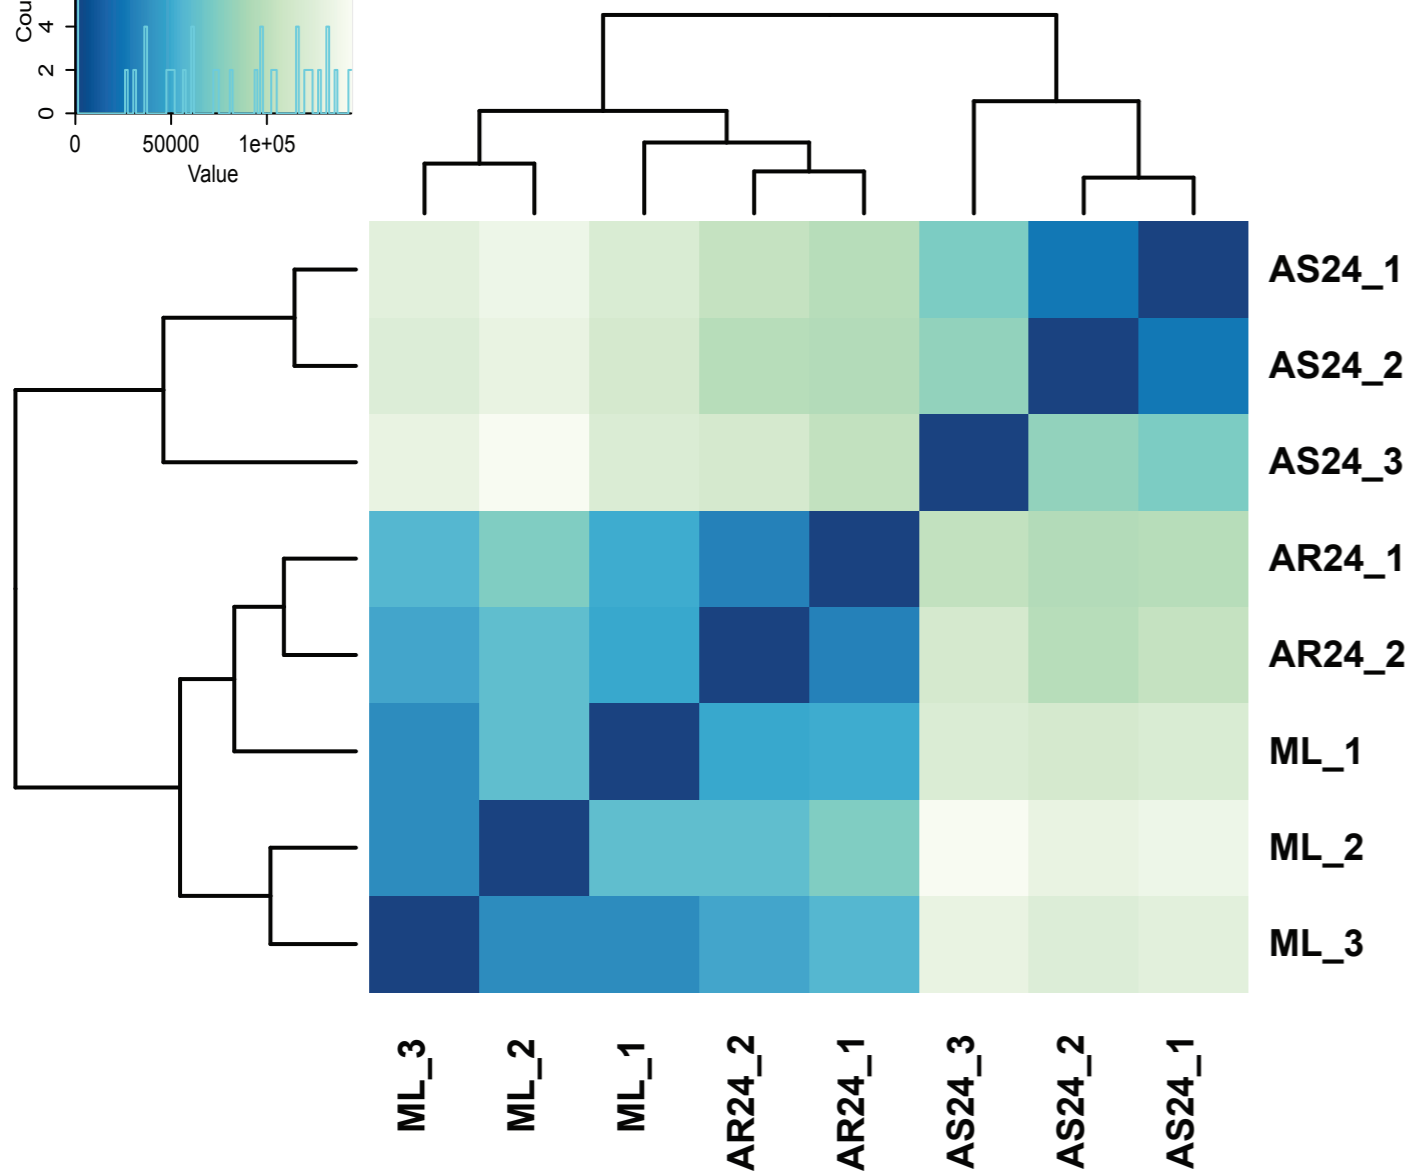**B**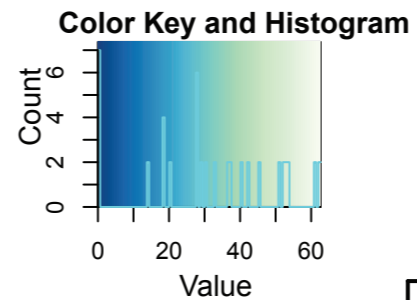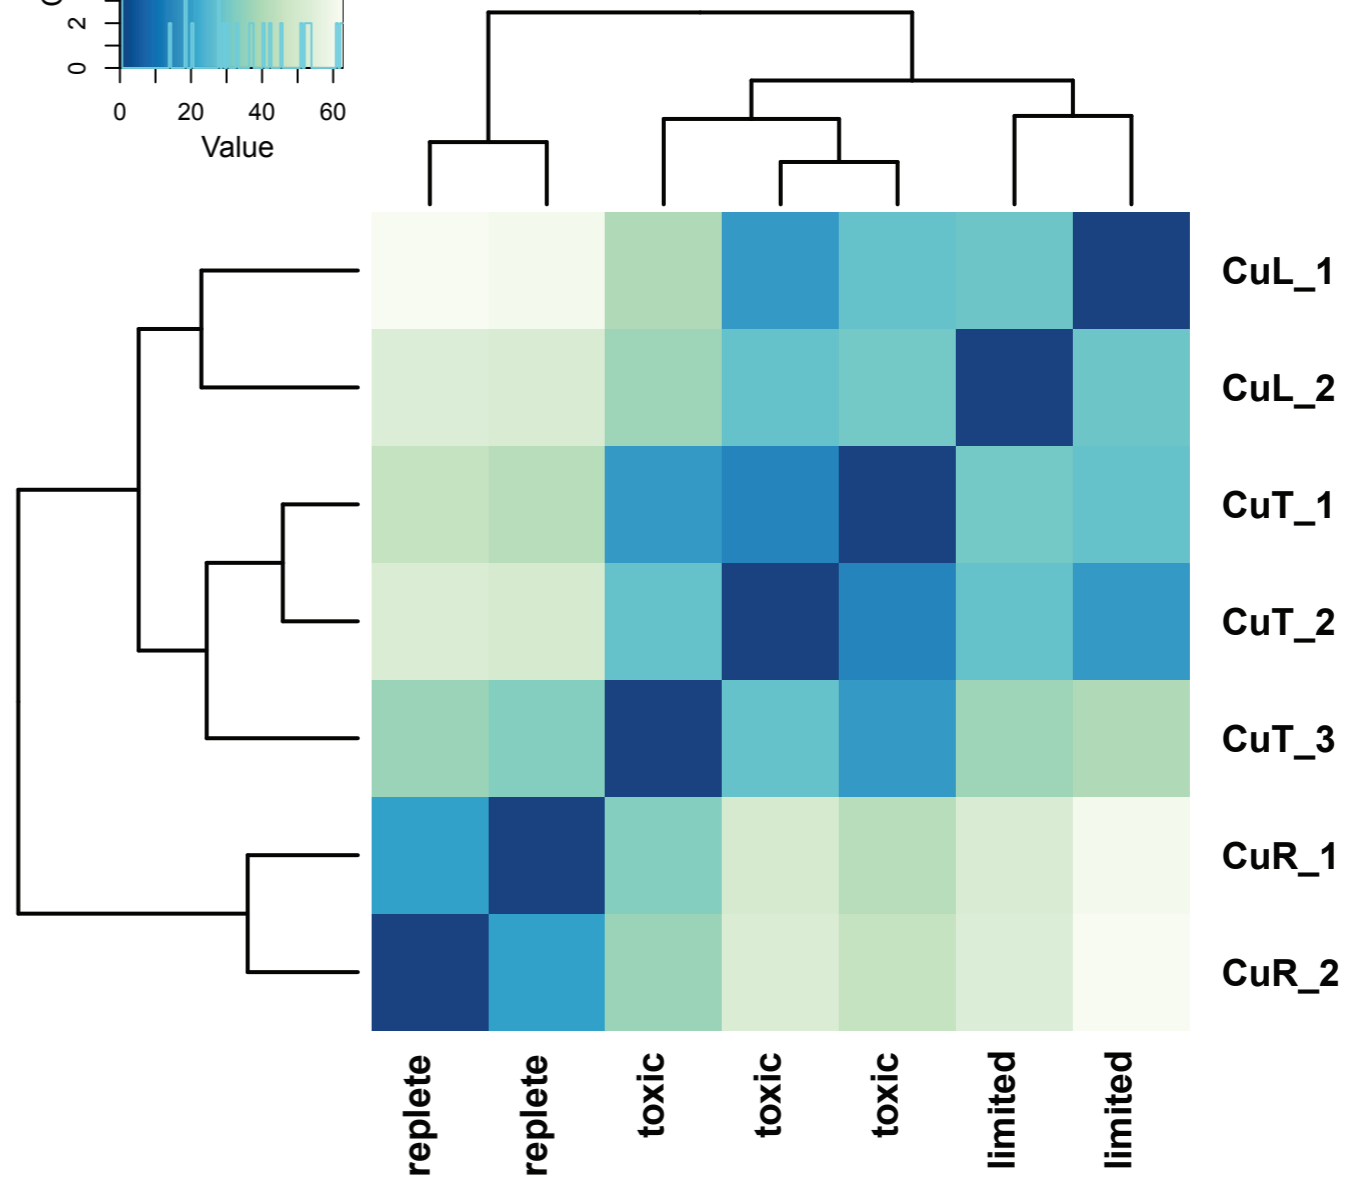

Supplement: ismej2017186x11.pdf [file ismej2017186x11.pdf]

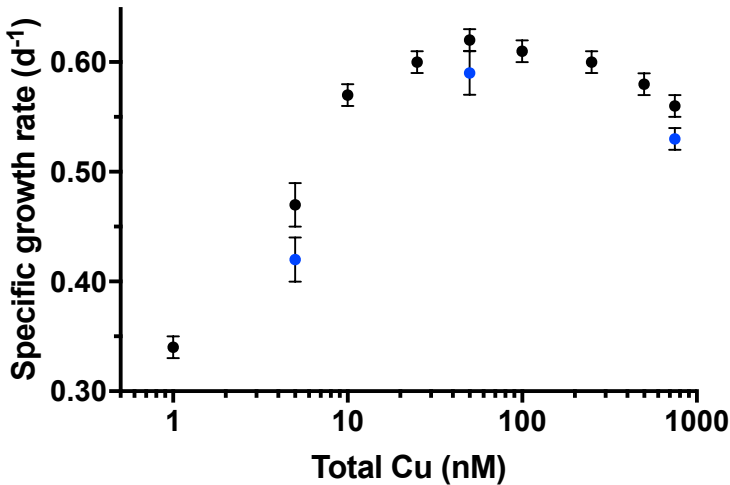

Supplement: ismej2017186x13.pdf [file ismej2017186x13.pdf]

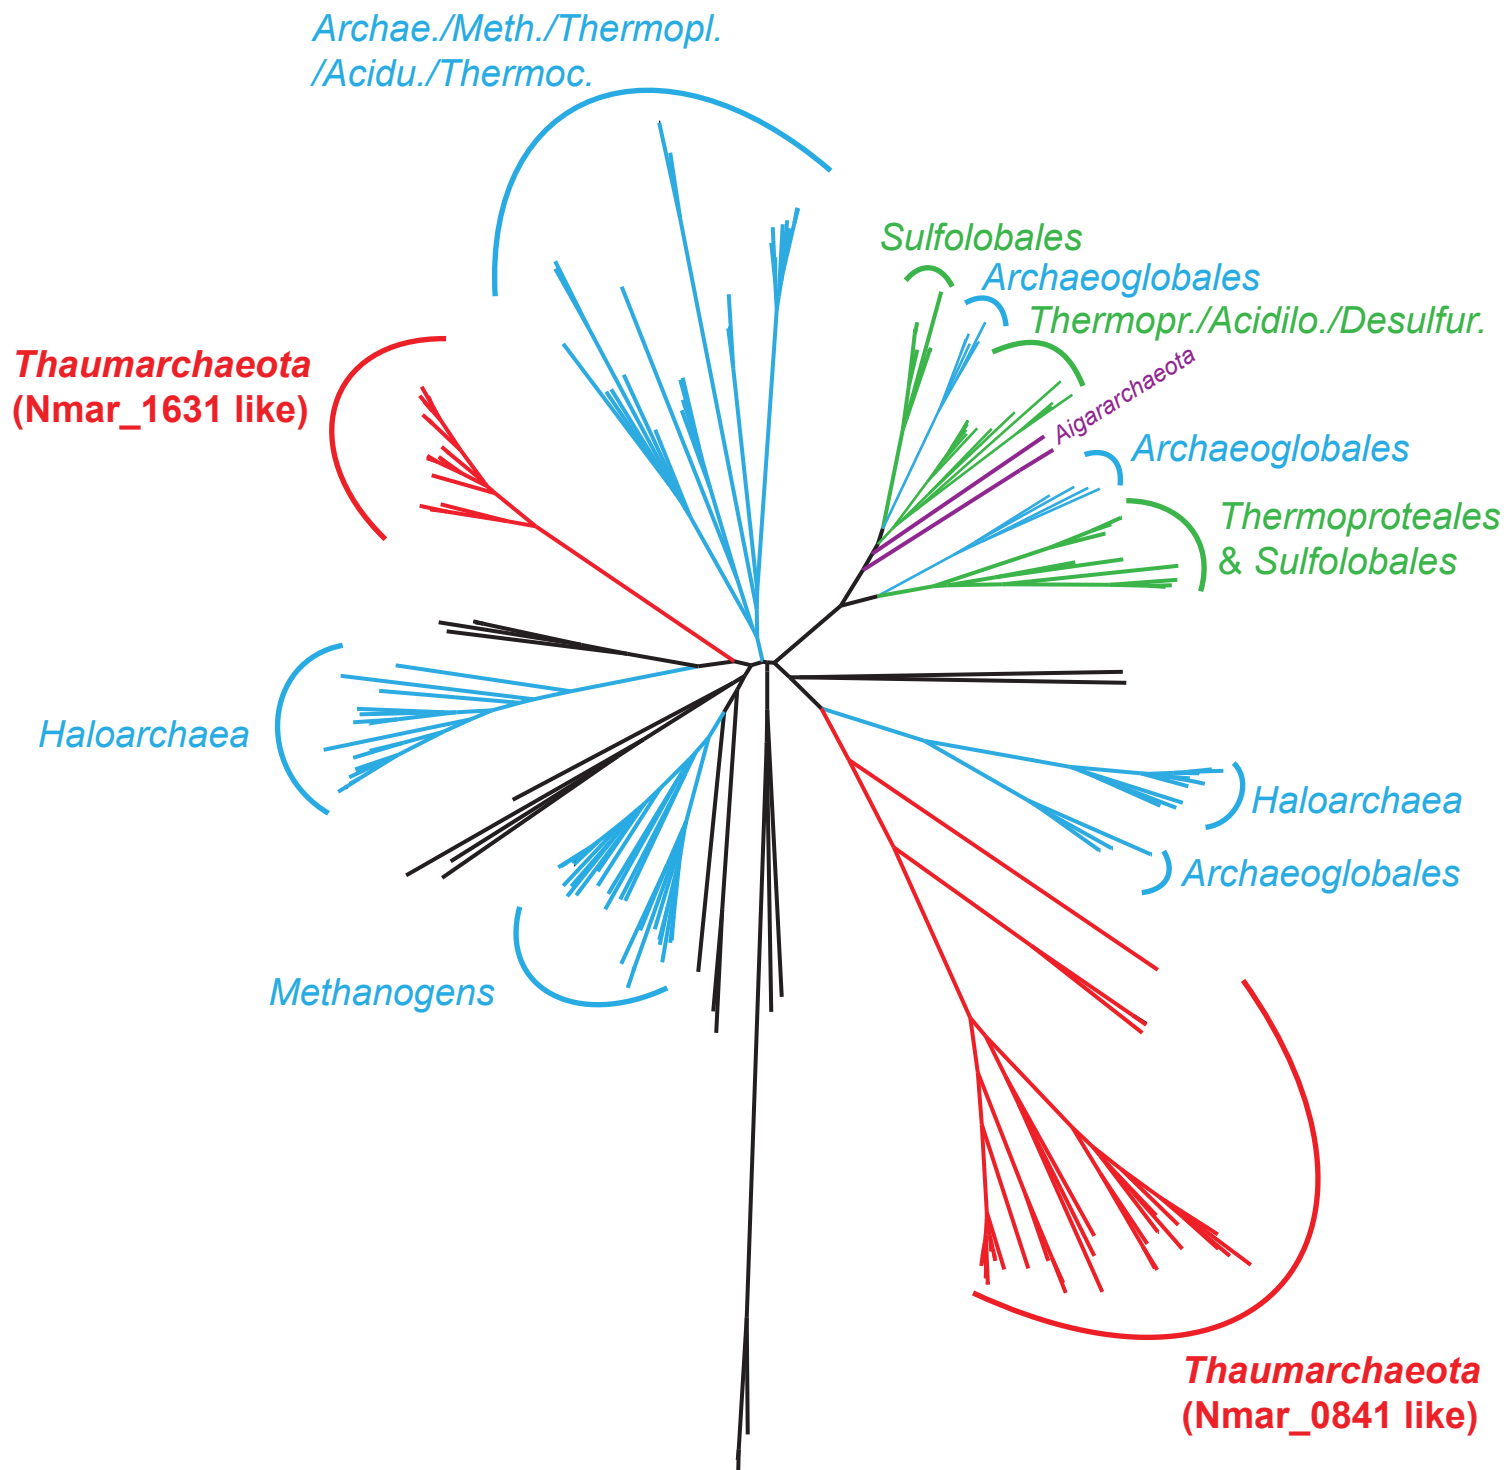

Supplement: ismej2017186x15.pdf [file ismej2017186x15.pdf]

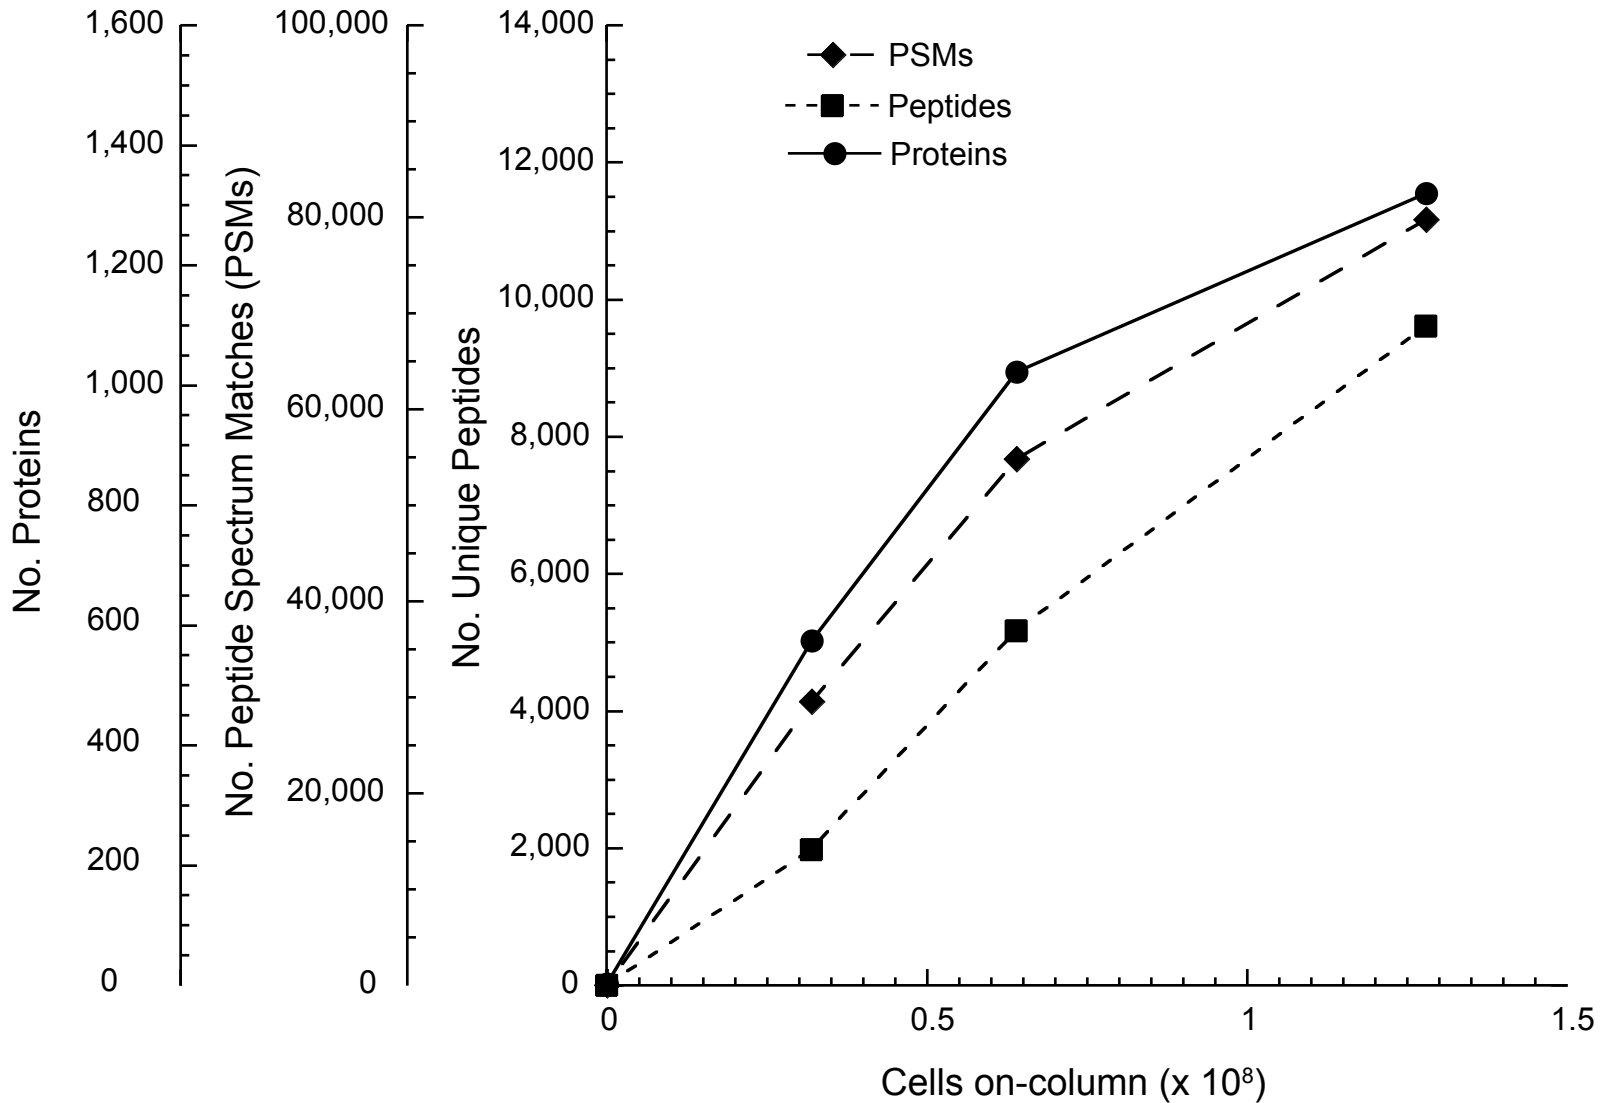

Supplement: ismej2017186x16.pdf [file ismej2017186x16.pdf]

a)

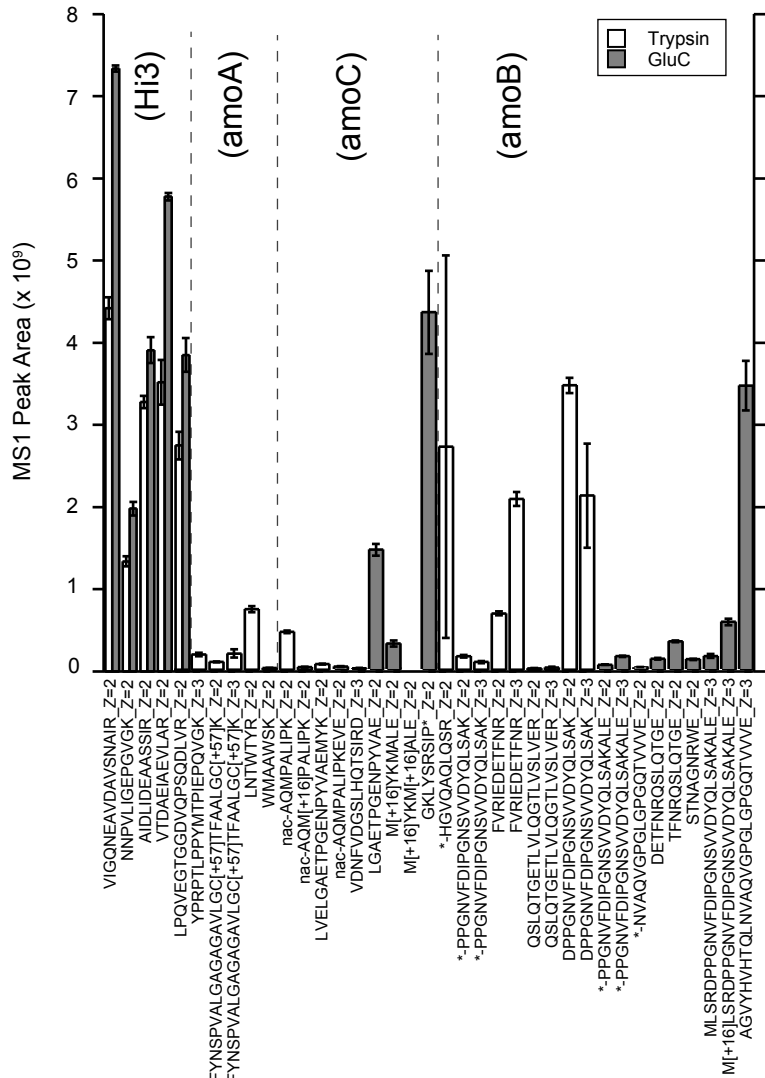

b)

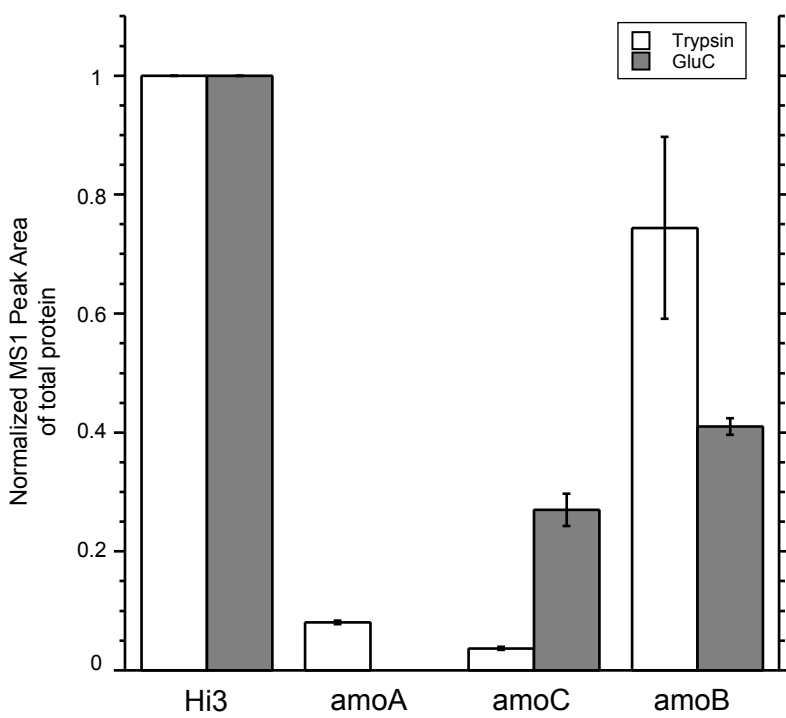

Supplement: ismej2017186x9.pdf [file ismej2017186x9.pdf]
